# Supplementary material
Source: publisher figshare collection journal article supplement (https://springernature.figshare.com/ndownloader/files/16633916)
Supplement: Supplementary file 1 [file 16633916]

## Sheet: Sheet1
Country	Year	Y	EG	SG	PG	OG
Bangladesh	1971	-5.47948	9.32867	7.64181	19.6658	11.556
Bangladesh	1972	-13.9737	9.32867	7.64181	24.0274	12.7585
Bangladesh	1973	3.32568	9.32867	7.64181	24.5236	12.8954
Bangladesh	1974	9.59196	9.2232	7.5607	25.0368	12.9694
Bangladesh	1975	-4.08821	9.11772	7.4907	25.0368	12.9061
Bangladesh	1976	5.66136	9.43414	7.4907	31.5137	14.8043
Bangladesh	1977	2.67306	9.86554	7.46742	31.7703	15.0196
Bangladesh	1978	7.07384	9.56836	7.47541	33.011	15.2591
Bangladesh	1979	4.80163	9.56836	7.47419	34.2685	15.6054
Bangladesh	1980	0.819142	9.53962	7.64653	34.5335	15.7319
Bangladesh	1981	7.23394	9.46289	7.63934	35.0466	15.8435
Bangladesh	1982	2.13433	10.6475	7.91341	35.5513	16.5044
Bangladesh	1983	3.88105	10.3844	7.99312	35.3032	16.372
Bangladesh	1984	4.80331	10.134	8.02003	34.8069	16.1562
Bangladesh	1985	3.34201	9.86018	8.22695	35.6324	16.363
Bangladesh	1986	4.17338	9.9944	8.37392	36.4253	16.6835
Bangladesh	1987	3.7724	9.58102	7.54471	37.4832	16.5223
Bangladesh	1988	2.41626	9.44144	7.5363	53.1216	20.7814
Bangladesh	1989	2.83658	9.44144	7.46654	53.6506	20.9015
Bangladesh	1990	5.62226	9.03342	7.44479	51.8008	20.2386
Bangladesh	1991	3.48523	9.03342	7.60924	56.144	21.4968
Bangladesh	1992	5.44269	9.00468	8.04851	60.2555	22.7824
Bangladesh	1993	4.71156	9.24437	8.7491	57.557	22.3821
Bangladesh	1994	3.89013	8.99932	9.26534	66.479	24.9457
Bangladesh	1995	5.12128	9.45532	9.50617	68.1627	25.6607
Bangladesh	1996	4.52292	12.3041	9.53644	68.8399	26.8701
Bangladesh	1997	4.4899	13.9359	10.2609	69.1954	27.815
Bangladesh	1998	5.17703	15.1148	12.1154	68.189	28.6408
Bangladesh	1999	4.67016	17.763	14.6646	69.2627	30.8184
Bangladesh	2000	5.29329	19.4305	15.719	70.6581	32.1844
Bangladesh	2001	5.07729	19.9743	16.5304	72.0787	33.0688
Bangladesh	2002	3.83312	21.774	17.4157	71.7905	33.9552
Bangladesh	2003	4.73957	22.1593	16.9545	71.6255	33.8762
Bangladesh	2004	5.23953	26.0604	17.3721	72.535	35.6663
Bangladesh	2005	6.53594	28.2423	18.2282	73.2626	36.9578
Bangladesh	2006	6.67187	30.3026	20.3485	73.7663	38.611
Bangladesh	2007	7.05864	30.5281	21.2424	74.8158	39.3105
Bangladesh	2008	6.01379	28.9705	21.6246	75.3699	39.0513
Bangladesh	2009	5.04512	28.0638	22.6094	75.0975	39.0179
Bangladesh	2010	5.5718	30.0763	22.6962	75.8578	39.9741
Bangladesh	2011	6.46438	31.1161	23.4884	76.4026	40.786
Bangladesh	2012	6.52144	33.3305	24.7178	75.6349	41.8145
Bangladesh	2013	6.0136	35.4893	23.9091	76.1796	42.4327
Bangladesh	2014	6.06109	33.6181	21.5624	75.8915	40.8224
Bhutan	1981	13.9077	43.0002	28.0121	13.9642	29.4605
Bhutan	1982	3.41394	42.7157	28.1896	13.9642	29.425
Bhutan	1983	11.3107	41.9686	28.3671	13.9642	29.2253
Bhutan	1984	4.48211	41.7906	28.5325	13.9642	29.2232
Bhutan	1985	4.21178	43.2133	28.6212	14.2207	29.8318
Bhutan	1986	11.7306	43.4519	28.7099	14.2207	29.9493
Bhutan	1987	28.6963	42.3494	28.7099	14.2207	29.5578
Bhutan	1988	4.98729	44.4835	28.7987	14.2207	30.3483
Bhutan	1989	7.43263	42.8828	28.7987	14.2207	29.78
Bhutan	1990	10.8764	42.7217	28.8874	14.4773	29.8263
Bhutan	1991	-0.407876	45.0543	28.964	15.5668	30.9832
Bhutan	1992	4.60089	47.0104	26.9874	15.5668	30.9479
Bhutan	1993	1.98637	45.3389	26.9752	15.5668	30.3499
Bhutan	1994	4.9515	43.7273	27.4189	15.5668	29.9415
Bhutan	1995	7.07412	44.972	27.5843	16.0957	30.5904
Bhutan	1996	5.56517	46.2131	27.5843	16.0957	31.031
Bhutan	1997	5.37384	45.4346	28.028	16.0957	30.9184
Bhutan	1998	5.91403	45.4346	28.1933	16.0957	30.9795
Bhutan	1999	7.98397	45.6228	28.4877	16.3681	31.2301
Bhutan	2000	6.93302	45.6125	29.4973	16.6246	31.67
Bhutan	2001	8.20377	44.2606	30.5412	17.4417	31.8007
Bhutan	2002	10.7278	43.9258	30.964	17.4259	31.8335
Bhutan	2003	7.66433	43.9107	28.8781	17.6983	31.1331
Bhutan	2004	5.89641	46.9801	31.8025	18.2272	33.4485
Bhutan	2005	7.12256	48.312	30.7594	19.5575	33.9031
Bhutan	2006	6.84937	50.2881	30.9462	20.9035	35.0448
Bhutan	2007	17.9258	45.4392	30.2007	21.1759	33.123
Bhutan	2008	4.76835	54.8451	31.5361	21.1759	36.9557
Bhutan	2009	6.65722	54.1963	31.9071	21.9772	37.0833
Bhutan	2010	11.7309	57.656	31.4045	21.9287	38.1127
Bhutan	2011	7.89091	58.9827	31.506	21.9287	38.6212
Bhutan	2012	5.07171	60.377	31.7719	22.1853	39.2852
Bhutan	2013	2.1425	61.9397	32.0401	22.1853	39.9391
Bhutan	2014	5.74546	58.7496	32.5127	38.8543	43.5769
India	1971	1.64293	18.0728	7.04587	59.0969	25.3124
India	1972	-0.553301	18.0728	6.96476	59.6259	25.4283
India	1973	3.29552	18.0728	6.89476	61.4039	25.8927
India	1974	1.18534	18.0728	6.89476	61.6847	25.9702
India	1975	9.14991	18.8645	6.81365	62.7268	26.5086
India	1976	1.6631	18.9699	6.91246	63.7688	26.8699
India	1977	7.25476	18.9699	6.91246	64.2735	27.009
India	1978	5.71253	18.5741	6.77733	65.2829	27.0969
India	1979	-5.23818	18.044	6.79331	64.7466	26.7667
India	1980	6.73582	17.5162	6.75526	64.7308	26.5609
India	1981	6.0062	17.25	7.02409	64.186	26.4154
India	1982	3.47573	17.5261	7.09721	63.8979	26.461
India	1983	7.28889	17.7923	7.539	64.6834	26.9352
India	1984	3.82074	17.9288	7.55327	64.6834	26.9889
India	1985	5.2543	17.5329	7.46382	64.9399	26.8861
India	1986	4.77656	17.4373	7.60421	65.1965	26.9747
India	1987	3.96536	17.1711	7.62897	63.5622	26.4388
India	1988	9.62778	17.8112	8.14923	76.783	30.5033
India	1989	5.94734	18.4831	8.47593	73.1685	29.8659
India	1990	5.53345	18.6242	8.59354	72.6974	29.8295
India	1991	1.05683	22.7344	9.08891	74.3316	31.9224
India	1992	5.4824	23.2423	9.91178	78.0553	33.4333
India	1993	4.75078	23.6267	10.7033	81.8536	34.9092
India	1994	6.65892	23.6046	11.4237	83.6455	35.6614
India	1995	7.57449	25.9732	14.2992	82.8368	37.3411
India	1996	7.54952	25.5885	24.6918	83.9021	41.3355
India	1997	4.04982	25.8235	25.5343	83.9852	41.7529
India	1998	6.18442	27.0946	26.6696	83.5393	42.5004
India	1999	8.84576	27.2392	27.674	84.5299	43.1958
India	2000	3.84099	29.1125	28.3073	86.1399	44.5386
India	2001	4.82397	30.1877	28.6963	86.7677	45.2371
India	2002	3.80398	31.911	29.0723	86.2229	45.8376
India	2003	7.86038	34.2688	29.0268	86.7276	46.7972
India	2004	7.92294	34.9779	29.0465	86.4553	46.9811
India	2005	9.28482	39.3686	28.9449	87.8517	48.8875
India	2006	9.26396	39.5189	31.2623	89.3712	50.2155
India	2007	9.80136	42.4227	31.0192	90.1883	51.3821
India	2008	3.89096	42.3506	29.8355	90.6688	51.0519
India	2009	8.47978	42.2332	29.6573	90.6688	50.9444
India	2010	10.26	42.127	29.9203	91.2135	51.154
India	2011	6.63836	41.6585	30.3138	91.7761	51.2881
India	2012	5.45639	43.0527	30.5619	91.5037	51.7996
India	2013	6.38611	41.8925	30.6976	91.7761	51.5128
India	2014	7.50522	44.3551	31.0794	91.2314	52.378
Nepal	1971	-1.19538	10.0963	11.3256	18.2152	12.7887
Nepal	1972	3.1178	10.0963	11.2556	18.9681	12.9704
Nepal	1973	-0.476536	10.2018	11.0345	19.9933	13.2089
Nepal	1974	6.33359	10.0963	10.9645	41.8421	19.1697
Nepal	1975	1.45647	10.3073	10.8134	23.5326	14.1406
Nepal	1976	4.39854	10.5182	10.6734	23.0605	14.0336
Nepal	1977	3.01697	10.5182	10.6193	23.8629	14.2349
Nepal	1978	4.40574	10.5182	10.4682	44.6454	19.9092
Nepal	1979	2.36888	10.7579	10.4382	45.3236	20.1702
Nepal	1980	-2.31939	10.9689	10.4321	44.209	19.9355
Nepal	1981	8.34197	10.9401	10.421	43.9366	19.8461
Nepal	1982	3.77937	10.8346	10.4449	44.1343	19.872
Nepal	1983	-2.97741	10.6951	10.421	23.5747	14.145
Nepal	1984	9.68113	10.9689	10.4125	24.8638	14.5945
Nepal	1985	6.14491	10.9689	10.479	45.9514	20.4333
Nepal	1986	4.56565	11.0797	10.5783	46.6538	20.703
Nepal	1987	1.69562	11.3535	10.6263	47.4225	21.0298
Nepal	1988	7.69681	11.8616	10.8001	47.6948	21.3495
Nepal	1989	4.32965	11.5932	10.9327	48.7527	21.5948
Nepal	1990	4.63504	11.6273	11.1704	48.9608	21.7521
Nepal	1991	6.36815	12.7877	11.4311	49.3301	22.3622
Nepal	1992	4.10641	13.5508	12.2069	50.817	23.3295
Nepal	1993	3.84985	14.8886	12.7857	51.5688	24.2255
Nepal	1994	8.216	15.5644	12.6102	52.8991	24.7674
Nepal	1995	3.46845	16.796	12.7597	53.2209	25.3487
Nepal	1996	5.32828	20.0381	13.9868	54.1621	27.2124
Nepal	1997	5.04861	20.5497	15.5975	55.7983	28.4399
Nepal	1998	3.01639	20.3579	16.5006	56.0801	28.7829
Nepal	1999	4.41257	19.5168	18.0968	57.1538	29.3697
Nepal	2000	6.2	20.0628	25.9425	59.7786	33.1841
Nepal	2001	4.79976	22.3935	25.3036	60.9176	34.0897
Nepal	2002	0.120267	22.4234	24.7128	62.5023	34.3192
Nepal	2003	3.94504	22.1047	20.7886	62.6936	32.8098
Nepal	2004	4.6826	21.3523	20.733	65.5414	33.3073
Nepal	2005	3.47918	24.9393	21.5396	65.7643	34.9402
Nepal	2006	3.36461	24.196	22.1193	67.0619	35.2481
Nepal	2007	3.41156	22.8466	22.5656	67.5751	35.0753
Nepal	2008	6.10464	21.5428	22.8131	68.104	34.8495
Nepal	2009	4.53308	23.0269	23.1305	68.8969	35.7123
Nepal	2010	4.81641	24.8487	25.3619	69.0882	37.2358
Nepal	2011	3.42183	24.0052	25.3212	69.3699	36.9989
Nepal	2012	4.78119	23.78	25.253	70.4194	37.1831
Nepal	2013	4.12888	26.6071	25.0192	70.6918	38.1757
Nepal	2014	5.98898	24.7196	25.6664	70.9147	37.8059
Pakistan	1971	0.468373	19.3266	15.1772	48.3084	25.7853
Pakistan	1972	0.813406	19.643	14.9352	49.301	26.082
Pakistan	1973	7.06426	19.7485	14.8587	51.5848	26.7209
Pakistan	1974	3.54019	19.4051	14.6933	52.6026	26.8185
Pakistan	1975	4.21142	19.5371	14.528	53.1157	26.9458
Pakistan	1976	5.15619	19.9859	14.528	53.3723	27.1759
Pakistan	1977	3.9477	20.3118	14.4763	54.8948	27.6923
Pakistan	1978	8.04853	19.7795	14.5375	55.0461	27.5676
Pakistan	1979	3.75844	20.6063	14.4575	53.9407	27.5269
Pakistan	1980	10.2157	20.815	14.5099	52.2823	27.1631
Pakistan	1981	7.92076	20.2992	14.5462	50.9046	26.6135
Pakistan	1982	6.53749	21.4524	14.529	48.998	26.4909
Pakistan	1983	6.77838	21.9098	14.6526	48.998	26.699
Pakistan	1984	5.06521	22.0705	14.7853	49.3673	26.9069
Pakistan	1985	7.59211	23.1742	14.9145	49.6238	27.4172
Pakistan	1986	5.50165	23.5557	15.008	49.8804	27.6579
Pakistan	1987	6.45234	23.9871	14.9613	50.3851	27.933
Pakistan	1988	7.62528	23.2766	14.777	51.3861	27.8886
Pakistan	1989	4.95977	24.3489	14.82	66.9405	32.5738
Pakistan	1990	4.45859	25.4943	15.0429	67.1748	33.1274
Pakistan	1991	5.06157	24.9072	15.9995	71.3825	34.4323
Pakistan	1992	7.7059	25.9265	15.2434	75.677	35.6991
Pakistan	1993	1.75775	26.2982	14.7443	80.2588	36.9101
Pakistan	1994	3.73742	28.0181	14.3613	81.1841	37.6345
Pakistan	1995	4.96261	28.4157	14.2146	81.8866	37.9152
Pakistan	1996	4.84658	29.7558	16.4083	82.6291	39.4057
Pakistan	1997	1.0144	31.484	19.1439	82.424	40.9728
Pakistan	1998	2.55023	32.4821	29.8807	80.3934	44.7316
Pakistan	1999	3.66013	32.6323	30.1216	80.996	45.04
Pakistan	2000	4.26009	33.8201	34.2976	83.0024	47.5568
Pakistan	2001	1.98248	33.2006	34.7707	84.5638	47.9421
Pakistan	2002	3.22443	40.1101	35.6741	84.2747	50.6491
Pakistan	2003	4.84632	34.6942	36.4482	85.0675	49.2306
Pakistan	2004	7.36857	35.9336	35.3235	85.241	49.3032
Pakistan	2005	7.6673	38.9531	34.8087	86.4734	50.5251
Pakistan	2006	6.17754	39.7944	34.6424	86.9939	50.9059
Pakistan	2007	4.83282	42.0514	34.5542	87.547	51.8272
Pakistan	2008	1.70141	40.1022	34.8155	88.3241	51.4459
Pakistan	2009	2.83166	38.0611	36.8379	88.0517	51.3927
Pakistan	2010	1.60669	37.9828	36.6535	88.5807	51.4427
Pakistan	2011	2.7484	35.4918	35.7822	88.8372	50.3072
Pakistan	2012	3.50703	37.9107	35.6962	88.6385	51.0796
Pakistan	2013	4.39646	40.0154	35.2086	88.6385	51.6468
Pakistan	2014	4.67471	39.5722	34.933	87.3019	51.0192
